# Supplementary material for: The extracellular matrix controls gap junction protein expression and function in postnatal hippocampal neural progenitor cells
Source: Springer Nature journal article supplement (doi:10.1186/1471-2202-10-13), 2009-02-24
Supplement: Additional file 6 [file 1471-2202-10-13-s6.doc]

**Supplementary Table 1. Genotyping protocols**

| **Gene** | **Reaction Conditions and Amplicon Sizesa** | **Cycling parameters** |
| --- | --- | --- |
| Cx29 | Cx29F: 5’-ATCTGTGCTGTGCTATTTGGAGT-3’  Cx29R: 5’-ACAGGTTGTGCTGCCAATAC-3’  lacZF: 5’-CCGACGGCACGCTGATTGAAG-3’  lacZR: 5’-ATGCGGTCGCGTTCGGTTGC-3’  Primer concentrations: 10 ng/µL each  Volume of tail DNA: 5 µL  Final reaction volume: 20 µL  (+ allele=700 bp)  (- allele=1100 bp) | 95oC 5 m  *30 cycles:*  94oC 15 s  66oC 15 s  72oC 80 s |
| Cx30 | F: 5’-GGTACCTCCTACTAATTAGCTTGG-3’  lacZR: 5’-AGCGAGTAACAACCCGTCGGATTC-3’  WTR: 5’-AGGTGGTACCCATTGTAGAGGAAG-3’  Primer concentrations: 8 ng/µL each  Volume of tail DNA: 1 µL  Final reaction volume: 25 µL  (+ allele=544 bp)  (- allele=460 bp) | 94oC 5 m  *35 cycles:*  92oC 45 s  60oC 45 s  72oC 45 s  72oC 10 m |
| Cx32 | F: 5’-ATACACCTTGCTCAGTGGCGTGAATCGGCA-3’  R: 5’-TCATTCTGCTTGTATTCAGGTGAGAGGCGG-3’  Primer concentrations: 8 ng/µL each  Volume of tail DNA: 2.5 µL  Final reaction volume: 12.5 µL  (+ allele=750 bp) | 95oC 10 m  *30 cycles:*  95oC 60 s  67oC 60 s  72oC 60 s |
| F: 5’-TCTTACTCCACACAGGCATAGAGTGTCTGC-3’  R: 5’-TCATTCTGCTTGTATTCAGGTGAGAGGCGG-3’  Primer concentrations: 8 ng/µL each  Volume of tail DNA: 2.5 µL  Final reaction volume: 12.5 µL  (- allele=1300 bp) | 95oC 10 m  *30 cycles:*  95oC 60 s  67oC 60 s  72oC 60 s |
| Cx36 | F: 5’-AGCGGAGGGAGCAAACGAGAAG-3’  R: 5’-CTGCCGAAATTGGGAACACTGAC-3’  Primer concentrations: 8 ng/µL each  Volume of tail DNA: 5 µL  Final reaction volume: 25 µL  (+ allele=533 bp) | 94°C 60s  *30 cycles:*  94°C 15 s  69°C 15 s  72°C 45 s |
| PLAPF: 5’-GGTGAACCGCAACTGGTACT-3’  PLAPR: 5’-CCCACCTTGGCTGTAGTCAT-3’  Primer concentrations: 0.5 µM each  Volume of tail DNA: 5 µL  Final reaction volume: 20 µL  (- allele=187 bp) | 95oC 15m  *35 cycles:*  95oC 30s  63oC 90s  72oC 2m  72oC 15m |
| Cx37b | F: 5’-TGCTAGACCAGGTCCAGGAAC-3’  neoR: 5’-AGAGGCTATTCGGCTATGACT-3’  WTR: 5’-GTCCCTTCGTGCCTTTATCTC-3’  Primer concentrations: 125 nM each  Volume of tail DNA: 1.5 µL  Final reaction volume: 20 µL  (+ allele=750 bp)  (- allele=1300 bp) | 94oC 3 m  *30 cycles:*  94oC 30 s  63oC 30 s  72oC 90 s  72oC 5 m |
| Cx40c | F: 5’-TGGAGCCACAGTTGCAATGGT-3’  neoR: 5’-GCACGAGACTAGTGAGACGTG-3’  WTR: 5’-TCTCTGACTCCGAAAGGCAAG-3’  Primer concentrations: 20 ng/µL each  Volume of tail DNA: 2 µL  Final reaction volume: 30 µL  (+ allele=270 bp)  (- allele=470 bp) | 94oC 3 m  *30 cycles:*  94oC 30 s  64oC 30 s  72oC 30 s  72oC 4 m |
| Cx45d | CreTK139F: 5’-ATTTGCCTGCATTACCGGTC-3’  CreTK141R: 5’-ATCAACGTTTTGTTTTCGGA-3’  Primer concentrations: 4 ng/µL each  Volume of tail DNA: 2.5 µL  Final reaction volume: 12.5 µL  (Cre transgene=300 bp) | 94oC 5m  *30 cycles:*  94oC 30 s  56oC 30 s  72oC 60 s |
| Cx45F: 5’-CTTGGCTTCCTTAATTACTTTA-3’  Cx45R: 5’-CTTCCCTACAAATGTCGAATG-3’  neoR: 5’-AGGGGACGAAGACAGTAT3’  Primer concentrations: 0.8 µg/µL each  Volume of tail DNA: 2.5 µL  Final reaction volume: 12.5 µL  (+ allele=570 bp)  (Flx allele=610 bp  (- allele=820 bp) | 94oC 5m  *30 cycles:*  94oC 30 s  56oC 30 s  72oC 60 s |
| Cx47e | F: 5’-AAGGCTGGTGCTGCTGGAAT-3’  R: 5’-TGACCACCGTCTTGCCATCA-3’  Primer concentrations: 0.4 µM each  Volume of tail DNA: 5 µL  Final reaction volume: 25 µL  (+ allele=1100 bp) | 95oC 5 m  *35 cycles:*  95oC 15 s  67oC 15 s  72oC 3 m |
| F: 5’-TCGCATTGTCTGAGTAGGTGTC-3’  R: 5’-CAGAGTTCCTCTGCACAGAGAT-3’  Primer concentrations: 10 ng/µL each  Volume of tail DNA: 5 µL  Final reaction volume: 20 µL  (- allele=2200 bp) | 95oC 15 m  *35 cycles:*  95oC 30 s  64oC 90 s  72oC 2 m  72oC 15m |

aUnless otherwise stated, PCR reactions contain 1X Advantage 2 PCR buffer, 0.8 mM dNTPs and 0.4 µL of Advantage 2 Taq polymerase (Clontech)

bFinal concentration of dNTPs is 0.2 mM.

cFinal concentration of dNTPs is 0.2 mM. Reaction uses Titanium Taq Polymerase in 1X Titanium PCR Buffer

dReactions use Titanium Taq Polymerase in 1X Titanium PCR Buffer.

## eFor the + allele, final Advantage 2 PCR buffer concentration is 0.8X.

**Supplementary Table 2. RT-PCR protocolsa**

| **Gene** | **Primer Sequence** | **Primer Concentration** | **Amplicon length** |
| --- | --- | --- | --- |
| Cx26 (GJB2) | F: 5’-GGATGTGGCAGTCAGTATCA  R: 5’-TCTTGGCAGGAAGAAGTGTC | 0.5 µM | 368 bp |
| Cx29 (GJC3) | F: 5’-GGTTTTCGGCAATGAT  R: 5’-AGAAGCTTGAGGCTTTTAGC | 4 ng/µL | 278 bp |
| Cx30 (GJB6) | F: 5’-GCCAGGGTGCAAGAACGTCTGC  R: 5’-GGCATGGTTGGGTGGTTTCTC | 10 ng/µL | 535 bp |
| Cx32 (GJB1)b | F: 5’-GTGGCGTGAATCGGCACTCTAC  R: 5’-CTCCGCCACGTTGAGGATAATG | 10 ng/µL | 593 bp |
| Cx36 (GJD2) | F: 5’-AGCGGAGGGAGCAAACGAGAAG  R: 5’-CTGCCGAAATTGGGAACACTGAC | 10 ng/µL | 533 bp |
| Cx37 (GJA4) | F: 5’-AGAGCGGTTGCGGCAGAAAGAGG  R: 5’-TGGATGAGAGCCCGTTGTAGGTG | 10 ng/µL | 551 bp |
| Cx40 (GJA5) | F: 5’-TTTGGCCAAGTCACGGCAGGG  R: 5’-TTGTCACTGTGGTAGCCCTGAGG | 4 ng/µL | 311 bp |
| Cx43 (GJA1) | F: 5’-CCTGCCGCAATTACAACAAG  R: 5’-AAGGTCGCTGATCCACGATA | 10 ng/µL | 201 bp |
| Cx45 (GJC1)b | F: 5’-GAGGTGGGCTTTCTAATAGGGCAG  R: 5’-ATGGGGGTTGTTTTGGTGATGG | 10 ng/µL | 528 bp |
| Cx47 (GJC2) | F: 5’-GCTGGAGGAGATCCACAATCATTC  R: 5’-GTGTGGAGATGACCACTATCTGGA | 10 ng/µL | 233 bp |
| GAPDHb | F: 5’-TGGTGCTGAGTATGTCGTGGAGT  R: 5’-AGTCTTCTGAGTGGCAGTGATGG | 0.2 µM | 292 bp |

aAll reactions contained 1 µL of RT product, 0.8 mM dNTPs, 1X PCR Buffer, 1X Advantage 2 Taq Polymerase in a reaction volume of 25 µL except Cx32 and GAPDH reactions. Cycling parameter: 94oC 5 m, 35 cycles of 94oC 25 s, 59oC 50 s, 72oC 1 m 45 s and a final extension of 72oC 7 m.

b1X Titanium Taq Polymerase was used.

## Supplementary Table 3. List of primary and secondary antibodies used for immunocytochemistry and Western Blotting

| Antibody | Type | Species | Source | Dilution  Immuno | Dilution  Western | Dilution  Flow |
| --- | --- | --- | --- | --- | --- | --- |
| Cx26 | Polyclonal | Rabbit | Zymed | 1:25 | 1:100 | --- |
| Cx29 | Polyclonal | Rabbit | Dr.David Paul | 1:20 | --- | --- |
| Cx30 | Monoclonal | Mouse | Zymed | 1:50 | --- | 1:25 |
| Cx30 | Polyclonal | Rabbit | Zymed | --- | --- | 1:25 |
| Cx32 | Monoclonal | Mouse | Zymed | 1 µg/mL | 1:250 | --- |
| Cx36 | Polyclonal | Rabbit | Zymed | 5 µg/mL | 1:100 | --- |
| Cx37 | Polyclonal | Rabbit | Dr. Alex Simon | 1:200 | --- | --- |
| Cx40 | Polyclonal | Rabbit | Zymed | 1:50 | --- | --- |
| Cx43 | Monoclonal | Mouse | Chemicon | 1:100 | --- | 1:1000 |
| Cx43 | Polyclonal | Rabbit | Zymed | 1:100 | --- | --- |
| Cx45 | Polyclonal | Rabbit | Chemicon | 1:1000 | --- | --- |
| Cx47 | Polyclonal | Rabbit | Dr. David Paul | 1:250 | --- | --- |
| Actin | Monoclonal | Mouse | Sigma | --- | 1:1000 | --- |
| -galactosidase | Polyclonal | Rabbit | Chemicon | 1:1500 | --- | --- |
| BrdU | Monoclonal | Mouse | Roche | 6 µg/mL | --- | --- |
| DCX | Polyclonal | Guinea Pig | Chemicon | 1:4000 | --- | --- |
| GFAP | Polyclonal | Rabbit | Sigma | 1:100 | --- | --- |
| GFAP | Monoclonal  Cy-3 conjugated | Mouse | Sigma | 1:800 | --- | --- |
| GFAP | Monoclonal | Rat | Zymed | 1:40 | --- | 1:25 |
| Nestin | Monoclonal | Mouse | Chemicon | 1:50 | --- | 1:50 |
| NCAM | Monoclonal | Mouse | Sigma | 1:400 | --- | --- |
| NG2 | Polyclonal | Rabbit | Chemicon | 1:200 | --- | --- |
| NeuN | Monoclonal | Mouse | Chemicon | 1:100 | --- | --- |
| PDGFR | Monoclonal | Rat | BD | 1:300 |  |  |
| RIP | Monoclonal | Mouse | Chemicon | 1:1000 | --- | --- |
| TuJ1 (III-tubulin) | Monoclonal | Mouse | Research Diagnostics | 1:250 | --- | --- |
| Mouse IgG | Cy3-conjugated | Donkey | Jackson | 1:800 | --- | --- |
| Rabbit IgG | Cy3-conjugated | Donkey | Jackson | 1:600 | --- | --- |
| Mouse IgG | FITC-conjugated | Donkey | Jackson | 1:100 | --- | --- |
| Rabbit IgG | FITC-conjugated | Donkey | Jackson | 1:100 | --- | 1:50 |
| Rat IgG | FITC-conjugated | Donkey | Jackson | 1:80 |  |  |
| Mouse IgG | HRP-conjugated | Donkey | Jackson | --- | 1:2000 | --- |
| Rabbit IgG | HRP-conjugated | Donkey | Jackson | --- | 1:5000 | --- |
| Mouse IgG | Cy5-  conjugated | Goat | Invitrogen | --- | --- | 1:50 |
| Rat IgG | RPE-  conjugated | Goat | Serotec | --- | --- | 1:10 |
| Rabbit IgG | AMCA-  conjugated | Goat | Jackson | 1:100 | --- | --- |
| Mouse IgG | AMCA-  conjugated | Donkey | Jackson | 1:100 | --- | --- |
